# Supplementary material for: Energy use and life cycle greenhouse gas emissions of drones for commercial package delivery
Source: PubMed Central journal article supplement (PMC5811440; doi:10.1038/s41467-017-02411-5), 2018-02-13
Supplement: 41467_2017_2411_MOESM1_ESM.pdf [file 41467_2017_2411_MOESM1_ESM.pdf]

## Supplementary Information

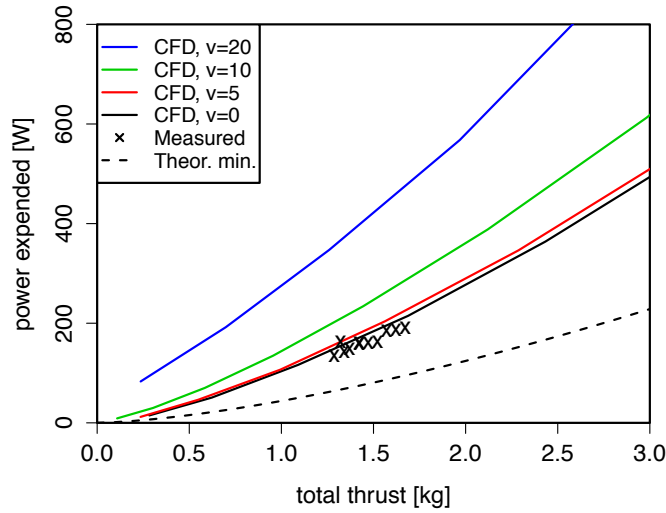

**Supplementary Figure 1:** Power vs. thrust relationship for the test model quadcopter. “CFD” lines are based on results provided by the rotor manufacturer based on a Computational Fluid Dynamics model. The power-thrust relationship changes depending on the incident air velocity,  $v$ . Results for several velocities are shown. Measured data have an average implied power efficiency of 53% compared to the theoretical minimum (Eq. 1). measured tilt of the drone, assuming force equilibrium (steady flight). Dashed line is the best-fit regression line, showing the drag coefficient decreases with speed.

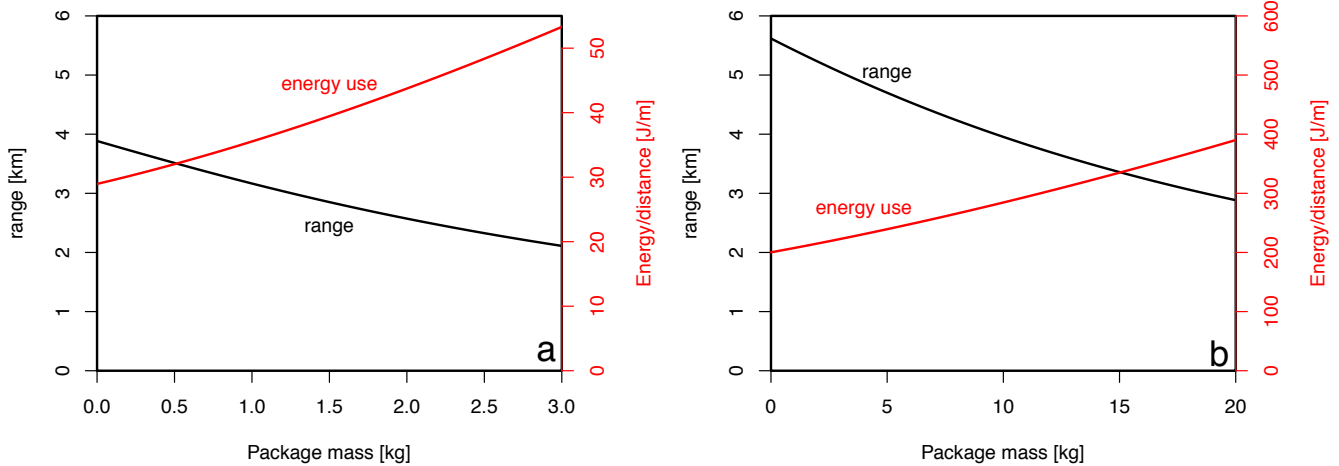

**Supplementary Figure 2:** Range and energy use as a function of package mass for the quadcopter (a) and octocopter (b). The maximum design payload masses for the quadcopter and octocopter test models are 0.5 and 8 kg, respectively. Drones can be designed for larger payloads, but would require more powerful motors, larger voltages, etc.

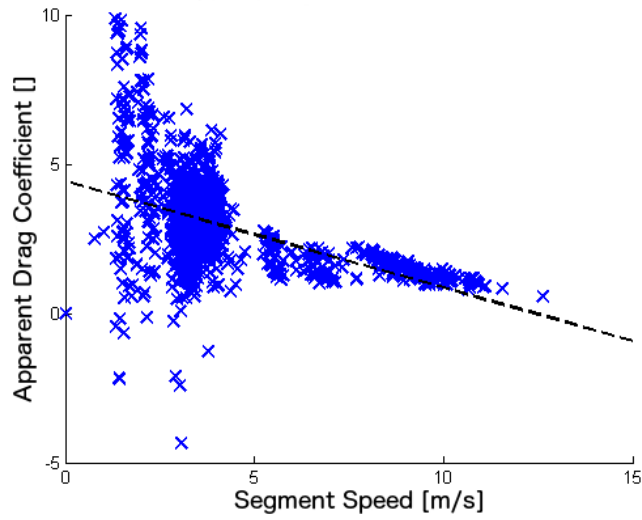

**Supplementary Figure 3:** Implied empirical drag coefficient vs. drone speed. Each point represents the average for a flight segment. The drag coefficient is based on the onboard measured tilt of the drone, assuming force equilibrium (steady flight). Dashed line is the best-fit regression line, showing the drag coefficient decreases with speed.

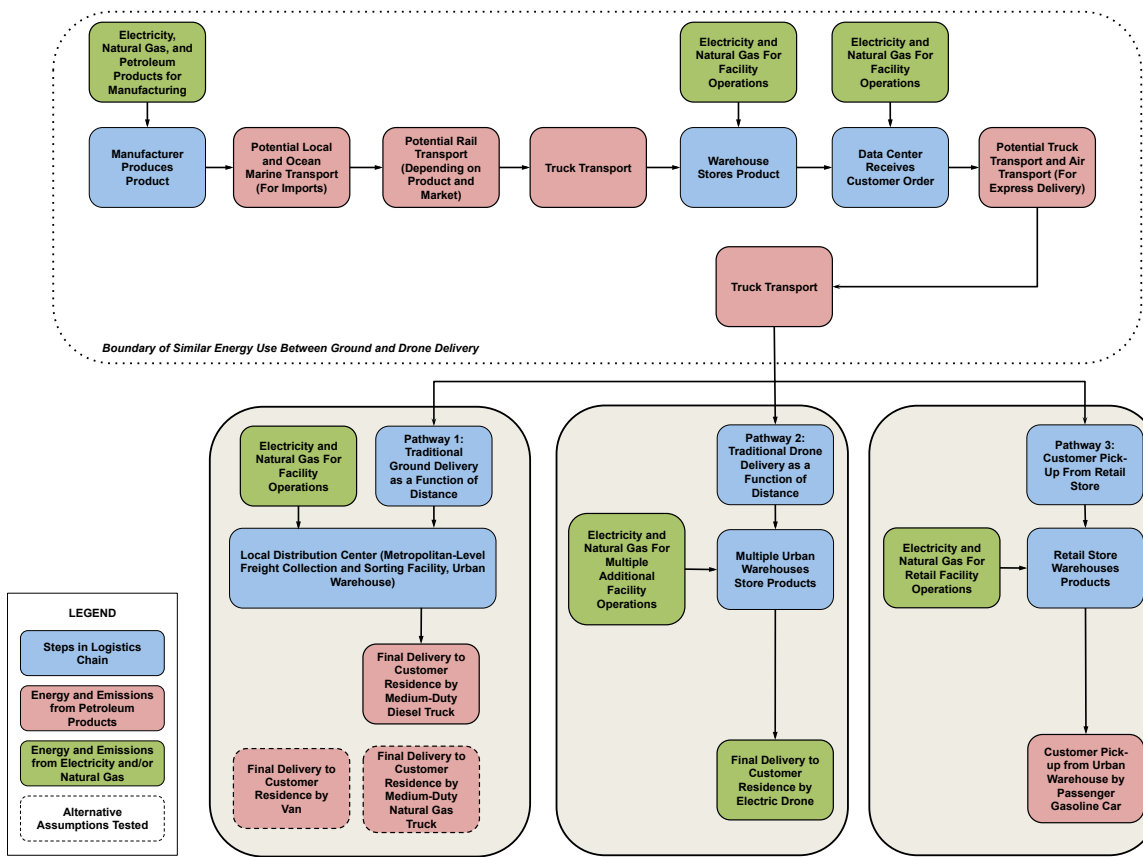

**Supplementary Figure 4:** System Boundary for Estimating Energy and Emissions Across Three Local Delivery Scenarios. GHG emissions are estimated across three broad delivery pathways. These include final delivery by medium-duty delivery truck, representing the most common existing logistics pathway; Package storage in additional urban warehouses, with final delivery by electric-powered drone; and customer pick-up from retail store or urban warehouse by gasoline or electric passenger vehicle

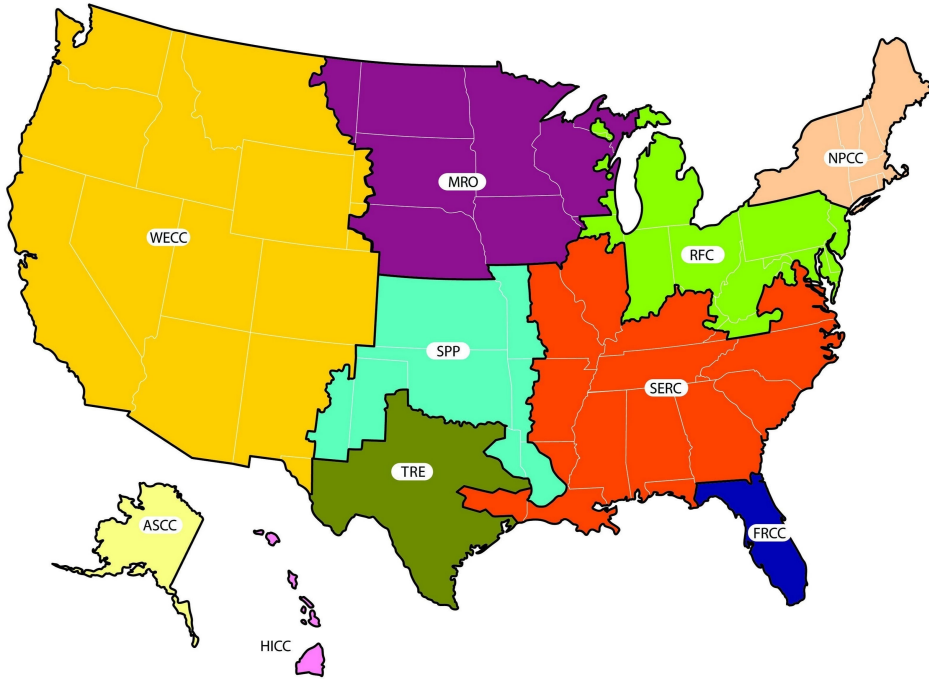

**Supplementary Figure 5: NERC Region Map used by EPA eGRID<sup>1</sup>**

**Map of eGRID Subregions**

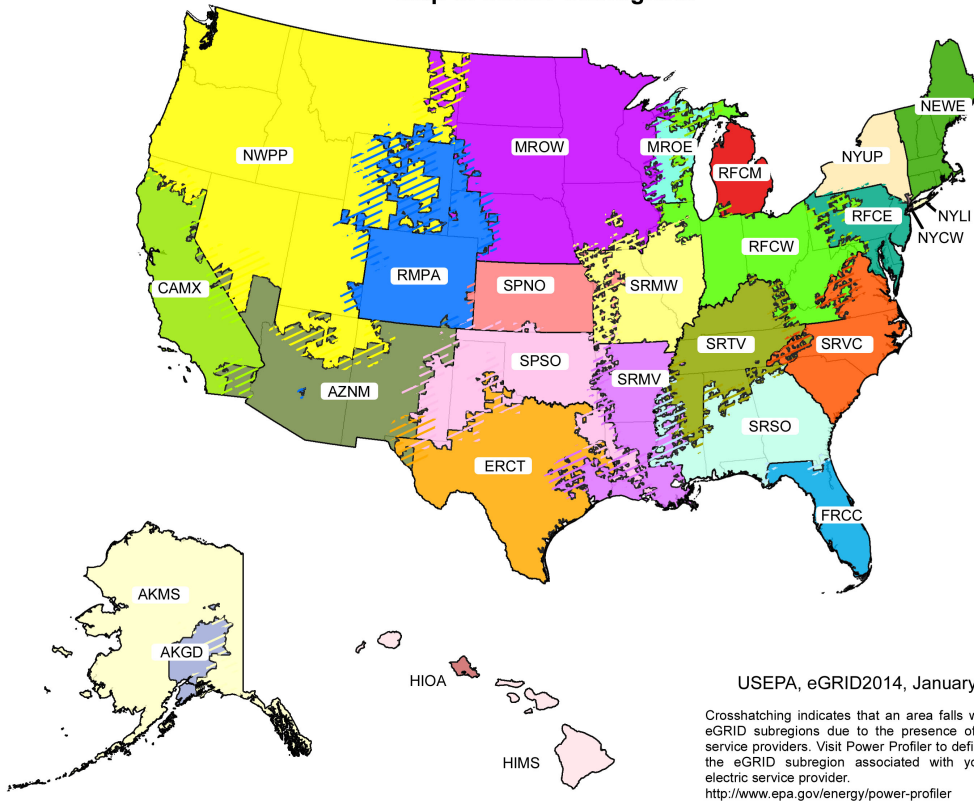

**Supplementary Figure 6: EPA Subregion Map used by EPA eGRID<sup>1</sup>**

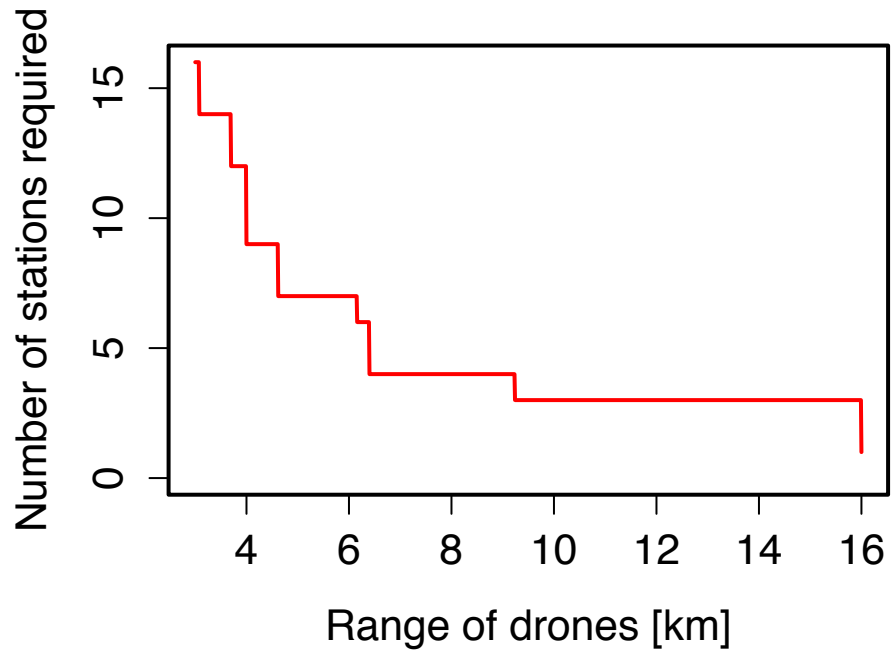

**Supplementary Figure 7:** Minimum number of warehouses or way stations required to service a square area 16 km on a side. Stations are arranged in a hexagonal pattern.

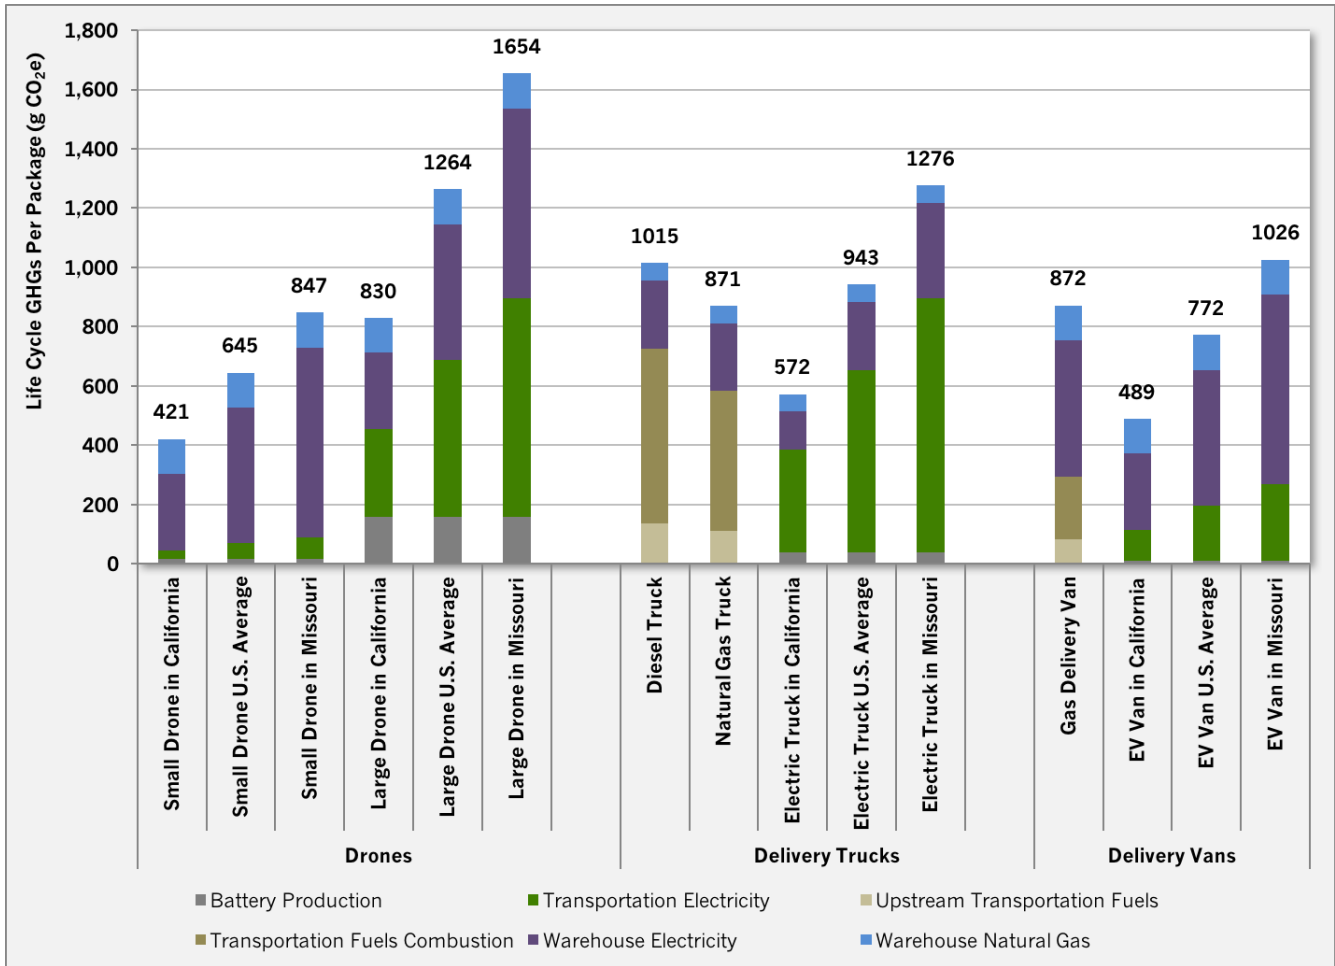

**Supplementary Figure 8:** Life cycle GHGs per package across drone, truck, and van pathways for diesel, natural gas, and electric vehicles (EVs). Total g CO<sub>2</sub>-eq per package values shown above each bar.

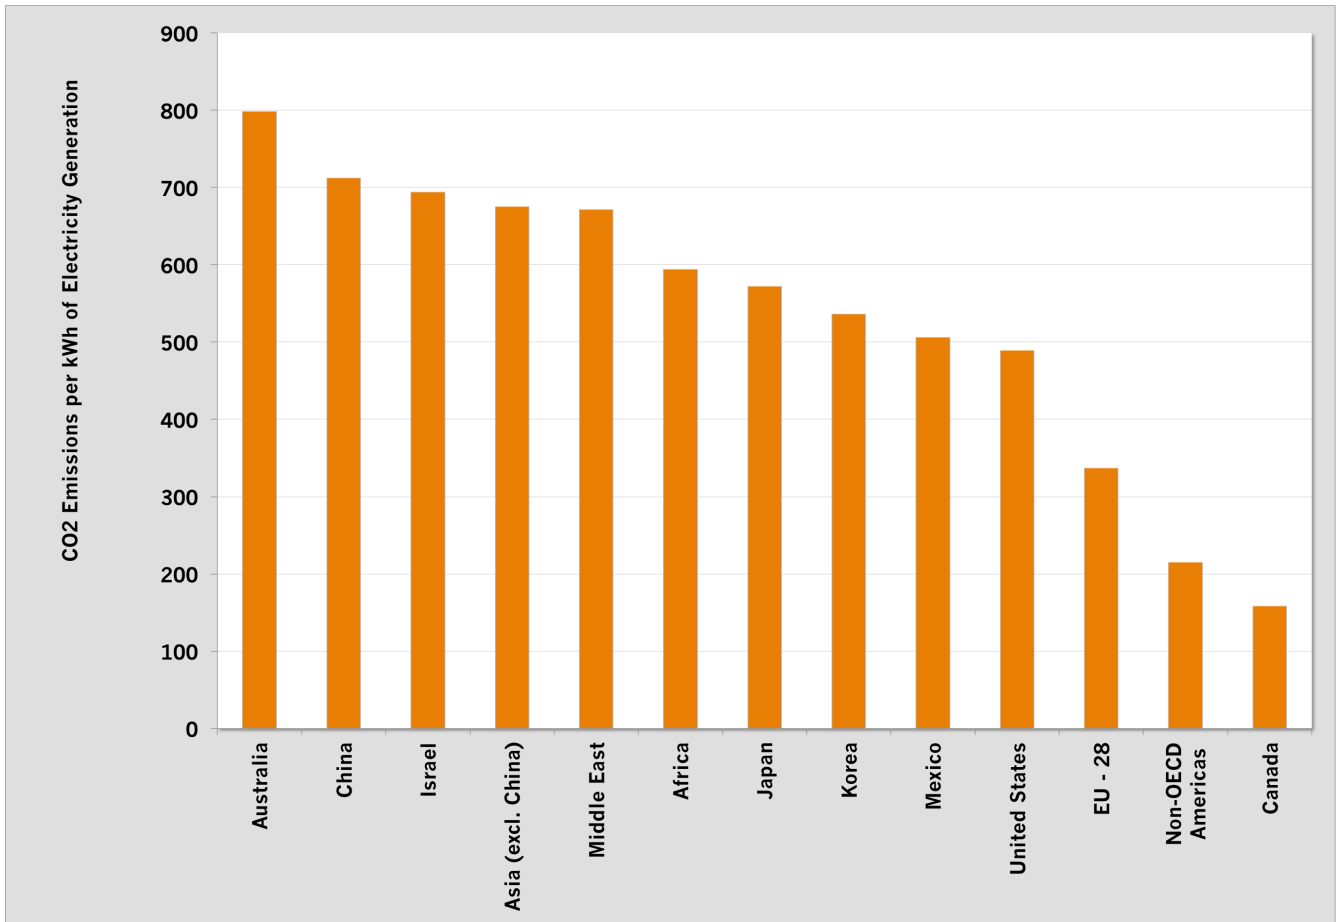

**Supplementary Figure 9:** CO<sub>2</sub> emissions per kWh of electricity for selected continents and countries. Data from IEA <sup>2</sup>.

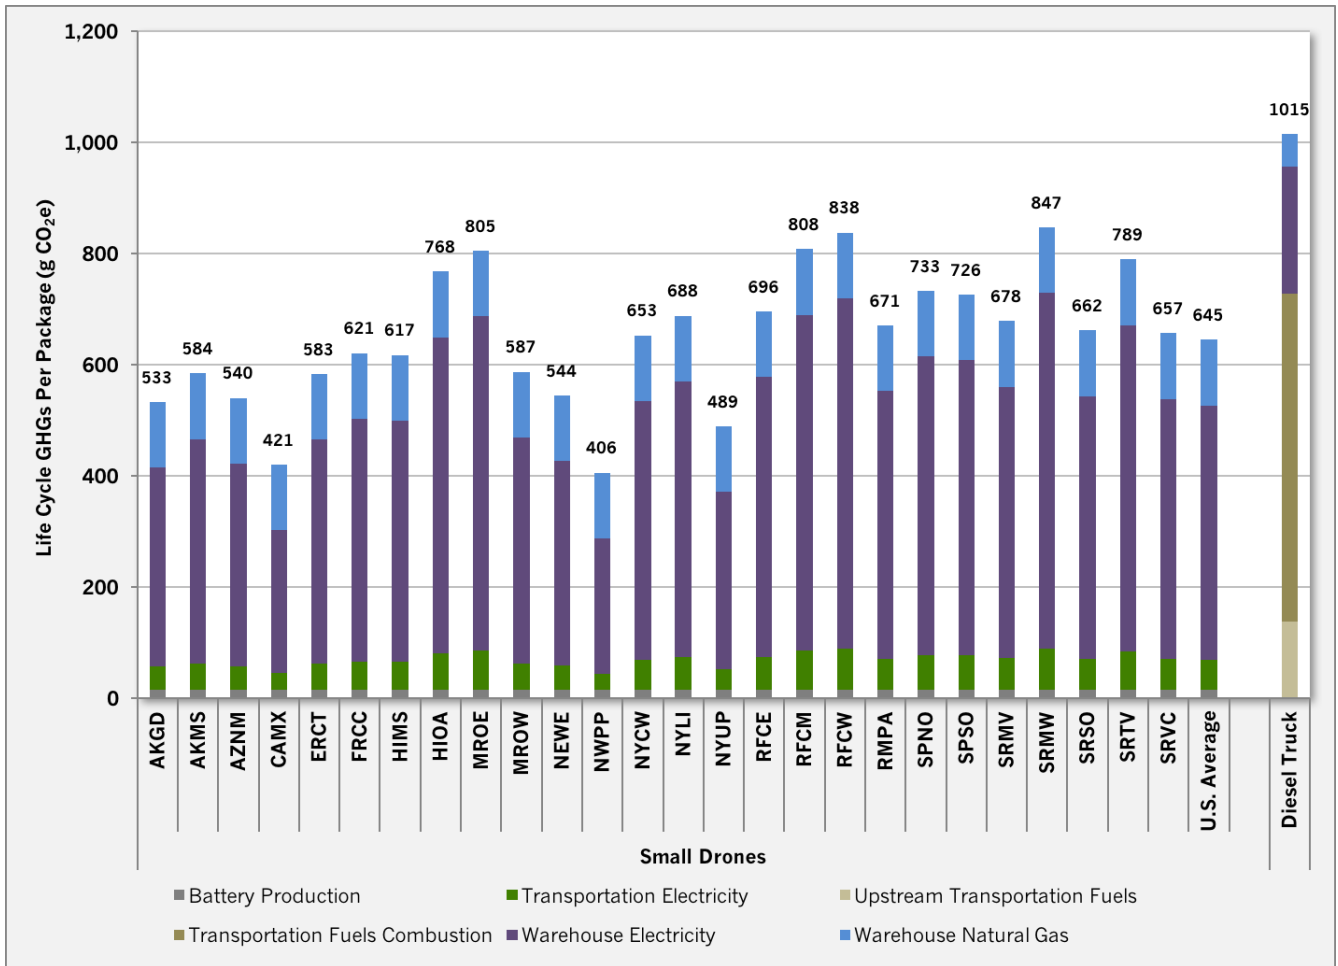

**Supplementary Figure 10:** Life cycle GHGs per package for small drones across e-GRID subregions, compared to diesel trucks. Total g CO<sub>2</sub>-eq per package values shown above each bar.



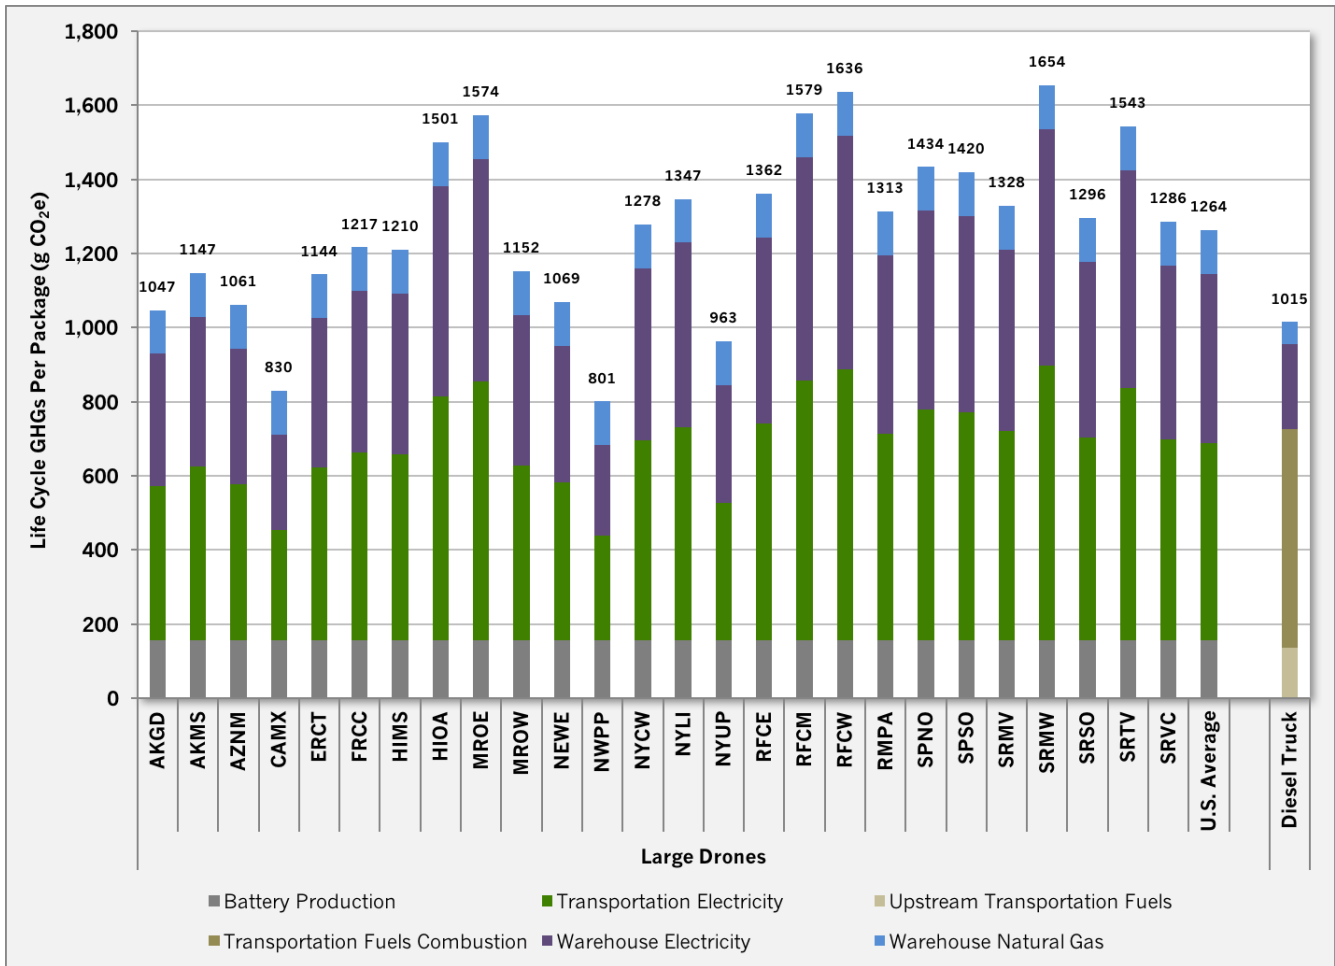

**Supplementary Figure 11:** Life cycle GHGs per package for large drones across e-GRID subregions, compared to diesel trucks. Total g CO<sub>2</sub>-eq per package values shown above each bar.

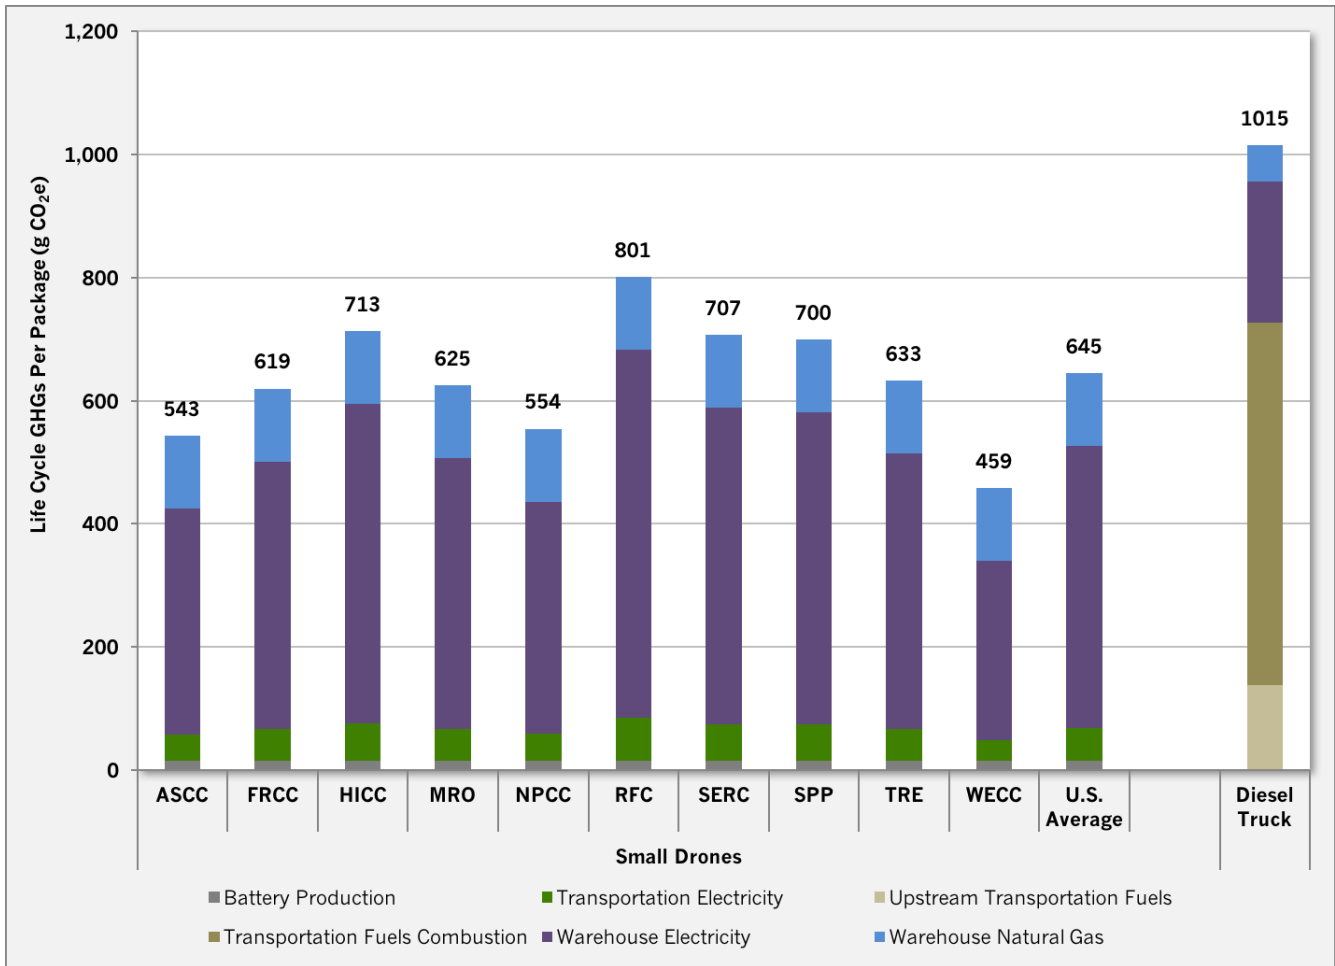

**Supplementary Figure 12:** Life cycle GHGs per package for small drones across NERC regions, compared to diesel trucks. Total g CO<sub>2</sub>-eq per package values shown above each bar.

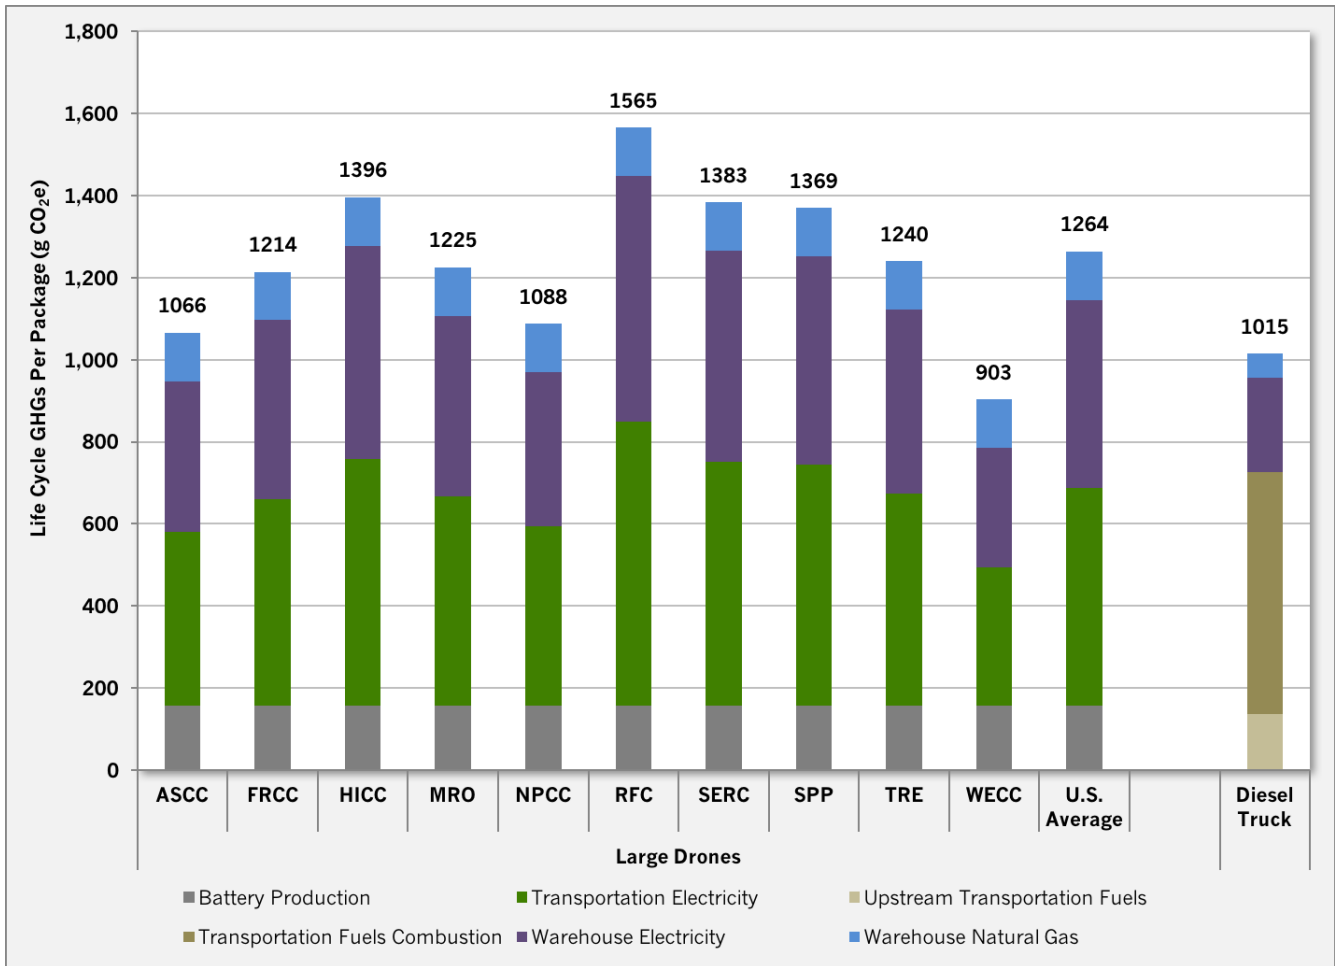

**Supplementary Figure 13:** Life cycle GHGs per package for large drones across NERC regions, compared to diesel trucks. Total g CO<sub>2</sub>-eq per package values shown above each bar.

**Supplementary Table 1: Base case parameter values used in the drone energy use model**

|                                                              | Quadcopter | Octocopter |
|--------------------------------------------------------------|------------|------------|
| mass of copter body [kg]                                     | 1.07       | 7          |
| mass of payload [kg]                                         | 0.5        | 7          |
| mass of battery [kg]                                         | 1          | 10         |
| number of rotors                                             | 4          | 8          |
| rotor diameter [m]                                           | 0.254      | 0.432      |
| projected area of drone body [m <sup>2</sup> ]               | 0.0599     | 0.224      |
| projected area of additional battery [m <sup>2</sup> ]       | 0.0037     | 0.015      |
| projected area of package [m <sup>2</sup> ]                  | 0.0135     | 0.0929     |
| drag coefficient of body                                     | 1.49       | 1.49       |
| drag coefficient of batteries                                | 1          | 1          |
| drag coefficient of package                                  | 2.2        | 2.2        |
| overall power efficiency                                     | 0.7        | 0.7        |
| energy density of battery [J/kg]                             | 540,000    | 540,000    |
| energy density of future battery technology [J/kg]           | 900,000    | 900,000    |
| mass density of battery [kg/m <sup>3</sup> ]                 | 3,300      | 3,300      |
| fraction of battery energy spent on a mission                | 0.5        | 0.5        |
| battery safety factor (total capacity / nominal requirement) | 1.2        | 1.2        |
| base case velocity [m/s]                                     | 10         | 10         |

**Supplementary Table 2:** Summary of current and proposed energy storage technologies.

| Battery Chemistry/Fuel Cell / Combustion Fuel | Theoretical Maximum Energy Density (Wh per kg / Wh per L) | Practical Energy Density (Wh per kg /Wh per L) | Proposed Maximum # of cycles | Depth of Discharge | Representative Range [km] |
|-----------------------------------------------|-----------------------------------------------------------|------------------------------------------------|------------------------------|--------------------|---------------------------|
| <b>Metal Battery Technology</b>               |                                                           |                                                |                              |                    |                           |
| Nickel Metal Hydride                          | 800 / 1,940 <sup>3</sup>                                  | 80 <sup>4</sup> / 190 <sup>a</sup>             | 200,000 <sup>3</sup>         | 80% <sup>5</sup>   | 1.8                       |
| Nickel Zinc                                   | 370 / 740 <sup>3</sup>                                    | 100 <sup>6</sup> / 200 <sup>a</sup>            | 250 <sup>5</sup>             | 60% <sup>5</sup>   | 2.3                       |
| Zinc-Air                                      | 700 <sup>7</sup> / NA                                     | 400 <sup>7</sup> / NA                          | 200 <sup>5</sup>             | 80% <sup>5</sup>   | 9.1                       |
| Lithium-Air                                   | 5,000 / 1,000 <sup>8</sup>                                | 1,000 <sup>8</sup> / 200 <sup>a</sup>          | 1 <sup>8</sup>               | 40% <sup>9</sup>   | 23                        |
| Lithium-Sulfur                                | 2,600 <sup>10</sup> / 2,800 <sup>11</sup>                 | NA / NA                                        | 400 <sup>8710</sup>          | NA                 | NA                        |
| <b>Li-ion Battery Technology</b>              |                                                           |                                                |                              |                    |                           |
| Lithium Polymer                               | 890 / 1440 <sup>5</sup>                                   | 107 / 170 <sup>12</sup>                        | 300 <sup>5</sup>             | 80% <sup>5</sup>   | 3.5                       |
| Lithium Cobalt (LCO)/Carbon                   | 990 / 4,980 <sup>13</sup>                                 | 220 <sup>14</sup> / 1,090 <sup>a</sup>         | 1200 <sup>5</sup>            | 100% <sup>5</sup>  | 5.0                       |
| Lithium Manganese (LMO)/Carbon                | 460 / 1,890 <sup>13</sup>                                 | 160 <sup>15</sup> / 660 <sup>a</sup>           | 300 <sup>5</sup>             | 80% <sup>5</sup>   | 3.6                       |
| Lithium Iron Phosphate (LFP)/Carbon           | 580 / 2,080 <sup>13</sup>                                 | 130 / 250 <sup>16</sup>                        | 3,000 <sup>16</sup>          | 100% <sup>16</sup> | 3.0                       |
| <b>Fuel Cell Technology Fuels</b>             |                                                           |                                                |                              |                    |                           |
| Hydrogen (liquid)                             | 33,300 / 2,360 <sup>17</sup>                              | 16,650 <sup>18</sup> / 1,180 <sup>a</sup>      | 9,000 <sup>b</sup>           | 100% <sup>c</sup>  | --                        |
| Hydrogen (200 bar)                            | 33,300 / 530 <sup>17</sup>                                | 16,650 <sup>18</sup> / 270 <sup>a</sup>        | 9,000 <sup>b</sup>           | 100% <sup>c</sup>  | 11                        |
| Methanol                                      | 5,550 / 4,390 <sup>17</sup>                               | 2,220 <sup>18</sup> / 1,760 <sup>a</sup>       | 9,000 <sup>d</sup>           | 100% <sup>c</sup>  | 20                        |
| <b>Hydrocarbon Combustion Fuels</b>           |                                                           |                                                |                              |                    |                           |
| Gasoline                                      | 12,400 / 9,100 <sup>18</sup>                              | 4,710 <sup>e</sup> / 3,450 <sup>e</sup>        | 80,470 <sup>f</sup>          | 100% <sup>c</sup>  | --                        |
| Methanol                                      | 5,550 / 4,390 <sup>17</sup>                               | 2,110 <sup>e</sup> / 1,660 <sup>e</sup>        | 80,470 <sup>f</sup>          | 100% <sup>c</sup>  | --                        |
| Nitromethane                                  | 3,230 <sup>19</sup> / 3,670 <sup>g</sup>                  | 1,220 <sup>e</sup> / 1,390 <sup>e</sup>        | 80,470 <sup>f</sup>          | 100% <sup>c</sup>  | --                        |
| Synthetic Oil                                 | 2,820 <sup>20</sup> / 2,490 <sup>g</sup>                  | 1,070 <sup>e</sup> / 940 <sup>e</sup>          | 80,470 <sup>f</sup>          | 100% <sup>c</sup>  | --                        |
| Glow Fuel <sup>h</sup>                        | 4,310 <sup>i</sup> / 3,930 <sup>i</sup>                   | 1,640 <sup>e</sup> / 1,500 <sup>e</sup>        | 80,470 <sup>f</sup>          | 100% <sup>c</sup>  | --                        |

<sup>a</sup> calculated from density determined from theoretical values

<sup>b</sup> calculated from 2,500 hour maximum lifetime<sup>21</sup>, with a cycle consisting of 16.6 min

<sup>c</sup> considering full use of a fuel tank

<sup>d</sup> calculated from 3,000 hour maximum lifetime<sup>22</sup>, with a cycle consisting of 16.6 min

<sup>e</sup> calculated from efficiency of internal combustion engine<sup>23</sup>

<sup>f</sup> calculated from 250,000 mile maximum lifetime, with a cycle consisting of 5 km

<sup>g</sup> calculated from density of nitromethane<sup>19</sup> and synthetic oil (type 15W-40)<sup>24</sup>

<sup>h</sup> composed of 50% methanol, 30% nitromethane, and 20% synthetic oil

<sup>i</sup> calculated from mixture characteristics

**Supplementary Table 3:** Parameters for the calculation of effective energy density of hydrogen and methanol fuel cell systems for use with drones.

| Parameter                      | Hydrogen Fuel Cell | Methanol Fuel Cell |
|--------------------------------|--------------------|--------------------|
| Energy capacity basis [W•h]    | 500                | 500                |
| Fuel mass [g]                  | 15                 | 90                 |
| Fuel volume [L]                | 0.9*               | 0.1                |
| Fuel tank mass [g]             | 750 <sup>25</sup>  | 210 <sup>26</sup>  |
| Fuel cell mass [g]             | 275 <sup>27</sup>  | 275 <sup>27</sup>  |
| System energy density [W•h/kg] | 480                | 867                |

\* Assuming hydrogen pressure of 200 bar.

**Supplementary Table 4: Vehicle and Fuels Parameters.** Drone values estimated in this study. Other vehicle and fuels parameters adapted from <sup>28-30</sup>. Estimated MJ/package values shown reflect base case assumptions in this analysis.

|                                       |       |            |
|---------------------------------------|-------|------------|
| Gallon of gasoline                    | 118.4 | MJ         |
| Gallon of diesel                      | 135.5 | MJ         |
| Class 4 Diesel package delivery truck | 11.5  | MPGDE      |
| Class 4 Diesel package delivery truck | 7.32  | MJ/km      |
| Class 4 Diesel package delivery truck | 7.8   | MJ/package |
| Class 4 CNG package delivery truck    | 10.8  | MPGDE      |
| Class 4 CNG package delivery truck    | 7.8   | MJ/km      |
| Class 4 CNG package delivery truck    | 8.3   | MJ/package |
| Class 4 EV package delivery truck     | 34.5  | MPGDE      |
| Class 4 EV package delivery truck     | 3.17  | MJ/km      |
| Class 4 EV package delivery truck     | 3.44  | MJ/package |
| Gasoline light-duty delivery van      | 24    | MPG        |
| Gasoline light-duty delivery van      | 3.06  | MJ/km      |
| Gasoline light-duty delivery van      | 3.3   | MJ/package |
| Gasoline light-duty personal car      | 31    | MPG        |
| Gasoline light-duty personal car      | 2.45  | MJ/km      |
| Gasoline light-duty personal car      | 50.5  | MJ/package |
| Electric light-duty delivery van      | 100   | MPGGE      |
| Electric light-duty delivery van      | 0.96  | MJ/km      |
| Electric light-duty delivery van      | 1.02  | MJ/package |
| EV light-duty personal car            | 124   | MPGGE      |
| EV light-duty personal car            | 0.77  | MJ/km      |
| EV light-duty personal car            | 15.9  | MJ/package |
| Small Drone                           | 0.04  | MJ/km      |
| Small Drone                           | 0.29  | MJ/package |
| Large Drone                           | 0.34  | MJ/km      |
| Large Drone                           | 2.9   | MJ/package |

Note: electric vehicle energy use includes losses in transmission, distribution, and charging, as discussed.

**Supplementary Table 5: Emissions Factors for Fuels.** Data are adapted from <sup>30</sup> and <sup>28</sup>.

|                             | Combustion GHGs<br>[g CO <sub>2</sub> -eq/MJ] | Upstream GHGs<br>[g CO <sub>2</sub> -eq/MJ] | Total GHGs<br>[g CO <sub>2</sub> -eq/MJ] |
|-----------------------------|-----------------------------------------------|---------------------------------------------|------------------------------------------|
| Diesel fuel                 | 75                                            | 18                                          | 93                                       |
| Gasoline (reformulated E10) | 65                                            | 25                                          | 90                                       |
| Compressed Natural Gas      | 57                                            | 20                                          | 77                                       |
| Natural Gas for Heating     | 57                                            | 13                                          | 70                                       |

**Supplementary Table 6: Non-Baseload Direct Emissions Factors Used for Electricity**

| <b>NERC Region</b>                                   | <b>Acronym</b> | <b>CO<sub>2</sub><br/>[g/kWh]</b> | <b>CH<sub>4</sub><br/>[g/kWh]</b> | <b>N<sub>2</sub>O<br/>g/kWh]</b> | <b>GHGs<br/>[g CO<sub>2</sub>e/kWh]</b> |
|------------------------------------------------------|----------------|-----------------------------------|-----------------------------------|----------------------------------|-----------------------------------------|
| Alaska Systems Coordinating Council                  | ASCC           | 419.9                             | 0.039                             | 0.006                            | 423                                     |
| Florida Reliability Coordinating Council             | FRCC           | 530.6                             | 0.074                             | 0.010                            | 531                                     |
| Hawaiian Islands Coordinating Council                | HICC           | 593.6                             | 0.118                             | 0.019                            | 594                                     |
| Midwest Reliability Organization                     | MRO            | 550.5                             | 0.128                             | 0.019                            | 551                                     |
| Northeast Power Coordinating Council                 | NPCC           | 442.9                             | 0.065                             | 0.009                            | 443                                     |
| Reliability First Corporation                        | RFC            | 772.8                             | 0.153                             | 0.022                            | 773                                     |
| SERC Reliability Corporation                         | SERC           | 648.8                             | 0.121                             | 0.017                            | 649                                     |
| Southwest Power Pool                                 | SPP            | 639.0                             | 0.112                             | 0.016                            | 639                                     |
| Texas Regional Entity                                | TRE            | 551.1                             | 0.066                             | 0.009                            | 551                                     |
| Western Electricity Coordinating Council             | WECC           | 326.8                             | 0.048                             | 0.007                            | 327                                     |
| U.S. Non-Baseload<br>Future Low-Carbon Grid Scenario | U.S.           | 568.4                             | 0.099                             | 0.014                            | 568<br>200                              |

Note: Data for Non-Baseload Emissions factors for NERC regions and the U.S. are from US EPA<sup>1</sup>. The data are from the 2017 version of eGRID, which use 2014 data. CH<sub>4</sub> and N<sub>2</sub>O global warming potentials from IPCC AR5<sup>31</sup> are used. Future low-carbon assumption represents sensitivity case for low-carbon regional electricity grid.

**Supplementary Table 7: Alternative Non-Baseload Direct Emissions Factors for Electricity**

| <b>EPA eGRID Subregion</b>      | <b>EPA Subregion Acronym</b> | <b>Corresponding NERC Region Acronym</b> | <b>GHGs [g CO<sub>2</sub>e/kWh]</b> | <b>eGrid- NERC % Difference</b> |
|---------------------------------|------------------------------|------------------------------------------|-------------------------------------|---------------------------------|
| ASCC Alaska Grid                | AKGD                         | ASCC                                     | 412                                 | -2.7%                           |
| ASCC Miscellaneous              | AKMS                         | ASCC                                     | 459                                 | 7.8%                            |
| WECC Southwest                  | AZNM                         | WECC                                     | 429                                 | 23.9%                           |
| WECC California                 | CAMX                         | WECC                                     | 272                                 | -20.1%                          |
| ERCOT All                       | ERCT                         | TRE                                      | 485                                 | -13.6%                          |
| FRCC All                        | FRCC                         | FRCC                                     | 532                                 | 0.3%                            |
| HICC Miscellaneous              | HIMS                         | HICC                                     | 472                                 | -25.7%                          |
| HICC Oahu                       | HIOA                         | HICC                                     | 662                                 | 10.4%                           |
| MRO East                        | MROE                         | MRO                                      | 780                                 | 29.4%                           |
| MRO West                        | MROW                         | MRO                                      | 503                                 | -9.5%                           |
| NPCC New England                | NEWE                         | NPCC                                     | 430                                 | -2.9%                           |
| WECC Northwest                  | NWPP                         | WECC                                     | 264                                 | -23.7%                          |
| NPCC NYC/Westchester            | NYCW                         | NPCC                                     | 567                                 | 21.9%                           |
| NPCC Long Island                | NYLI                         | NPCC                                     | 608                                 | 27.2%                           |
| NPCC Upstate NY                 | NYUP                         | NPCC                                     | 364                                 | -21.8%                          |
| RFC East                        | RFCE                         | RFC                                      | 632                                 | -22.3%                          |
| RFC Michigan                    | RFCM                         | RFC                                      | 782                                 | 1.2%                            |
| RFC West                        | RFCW                         | RFC                                      | 822                                 | 6.0%                            |
| WECC Rockies                    | RMPA                         | WECC                                     | 605                                 | 46.0%                           |
| SPP North                       | SPNO                         | SPP                                      | 689                                 | 7.3%                            |
| SPP South                       | SPSO                         | SPP                                      | 673                                 | 5.0%                            |
| SERC Mississippi Valley         | SRMV                         | SPP                                      | 608                                 | -5.1%                           |
| SERC Midwest                    | SRMW                         | SERC                                     | 837                                 | 22.5%                           |
| SERC South                      | SRSO                         | SERC                                     | 591                                 | -9.8%                           |
| SERC Tennessee Valley           | SRTV                         | SERC                                     | 759                                 | 14.5%                           |
| SERC Virginia/Carolina          | SRVC                         | SERC                                     | 583                                 | -11.3%                          |
| Future Low-Carbon Grid Scenario |                              |                                          | 200                                 | --                              |

Note: Data for Non-Baseload Emissions factors for EPA eGRID subregions are from US EPA<sup>1</sup>. The data are from the 2017 version of eGRID, which use 2014 data. Corresponding NERC regions shown are the best match and some small overlaps could occur in some cases. CH<sub>4</sub> and N<sub>2</sub>O global warming potentials from IPCC AR5<sup>31</sup> are used. Future low-carbon assumption represents sensitivity case for low-carbon regional electricity grid.



**Supplementary Table 8:** Upstream Emissions Factors for Electricity Fuels. Values are from are from Argonne National Laboratory <sup>30</sup>.

|                         | Upstream Mean<br>[g CO <sub>2</sub> -eq/kWh] |
|-------------------------|----------------------------------------------|
| Coal Electricity        | 74                                           |
| Natural Gas Electricity | 95                                           |
| Oil-Fired Electricity   | 149                                          |

**Supplementary Table 9:** Non-Baseload Weighted Fuel Mix by NERC Region

| NERC Region                              | Acronym | Coal  | Natural Gas | Oil   |
|------------------------------------------|---------|-------|-------------|-------|
| Alaska Systems Coordinating Council      | ASCC    | 12.2% | 73.6%       | 14.2% |
| Florida Reliability Coordinating Council | FRCC    | 22.3% | 76.4%       | 1.3%  |
| Hawaiian Islands Coordinating Council    | HICC    | 0.9%  | 0.0%        | 99.1% |
| Midwest Reliability Organization         | MRO     | 81.8% | 17.3%       | 0.9%  |
| Northeast Power Coordinating Council     | NPCC    | 12.0% | 82.9%       | 5.1%  |
| Reliability First Corporation            | RFC     | 70.7% | 27.7%       | 1.6%  |
| SERC Reliability Corporation             | SERC    | 53.1% | 45.9%       | 1.0%  |
| Southwest Power Pool                     | SPP     | 53.0% | 44.8%       | 2.2%  |
| Texas Regional Entity                    | TRE     | 35.5% | 64.4%       | 0.1%  |
| Western Electricity Coordinating Council | WECC    | 29.2% | 70.7%       | 0.1%  |
| U.S. Non-Baseload                        | U.S.    | 47.2% | 51.2%       | 1.6%  |

Note: Data for Non-Baseload resources for NERC regions and the U.S. are from US EPA<sup>1</sup>. The data are from the 2017 version of eGRID, which use 2014 data.

**Supplementary Table 10: Non-Baseload Weighted Fuel Mix by eGRID subregion**

| <b>EPA eGRID Subregion</b> | <b>EPA Subregion Acronym</b> | <b>Coal</b> | <b>Natural Gas</b> | <b>Oil</b> |
|----------------------------|------------------------------|-------------|--------------------|------------|
| ASCC Alaska Grid           | AKGD                         | 13.0%       | 74.7%              | 12.2%      |
| ASCC Miscellaneous         | AKMS                         | 0.0%        | 57.7%              | 42.3%      |
| WECC Southwest             | AZNM                         | 19.2%       | 80.8%              | 0.0%       |
| WECC California            | CAMX                         | 0.9%        | 99.0%              | 0.1%       |
| ERCOT All                  | ERCT                         | 24.1%       | 75.7%              | 0.1%       |
| FRCC All                   | FRCC                         | 22.2%       | 76.5%              | 1.3%       |
| HICC Miscellaneous         | HIMS                         | 2.9%        | 0.0%               | 97.1%      |
| HICC Oahu                  | HIOA                         | 0.0%        | 0.0%               | 100.0%     |
| MRO East                   | MROE                         | 79.5%       | 18.5%              | 2.0%       |
| MRO West                   | MROW                         | 82.8%       | 16.7%              | 0.5%       |
| NPCC New England           | NEWE                         | 14.1%       | 80.0%              | 6.0%       |
| WECC Northwest             | NWPP                         | 54.0%       | 45.8%              | 0.3%       |
| NPCC NYC/Westchester       | NYCW                         | 0.0%        | 96.1%              | 3.9%       |
| NPCC Long Island           | NYLI                         | 0.0%        | 88.0%              | 12.0%      |
| NPCC Upstate NY            | NYUP                         | 22.7%       | 74.9%              | 2.4%       |
| RFC East                   | RFCE                         | 40.6%       | 57.3%              | 2.1%       |
| RFC Michigan               | RFCM                         | 71.8%       | 26.9%              | 1.4%       |
| RFC West                   | RFCW                         | 80.9%       | 17.6%              | 1.5%       |
| WECC Rockies               | RMPA                         | 62.7%       | 37.3%              | 0.0%       |
| SPP North                  | SPNO                         | 82.5%       | 17.3%              | 0.2%       |
| SPP South                  | SPSO                         | 51.7%       | 45.9%              | 2.4%       |
| SERC Mississippi Valley    | SRMV                         | 33.5%       | 64.7%              | 1.8%       |
| SERC Midwest               | SRMW                         | 93.3%       | 6.6%               | 0.1%       |
| SERC South                 | SRSO                         | 50.0%       | 49.6%              | 0.4%       |
| SERC Tennessee Valley      | SRTV                         | 70.7%       | 28.8%              | 0.5%       |
| SERC Virginia/Carolina     | SRVC                         | 47.3%       | 50.9%              | 1.8%       |

Note: Data for Non-Baseload Emissions factors for EPA eGRID subregions are from US EPA<sup>1</sup>.

**Supplementary Table 11: Non-Baseload Life Cycle Electricity Emissions by NERC Region**

| <b>NERC Region</b>                                   | <b>Acronym</b> | <b>Upstream<br/>GHGs<br/>[g CO<sub>2</sub>e/kWh]</b> | <b>Direct GHGs<br/>[g CO<sub>2</sub>e/kWh]</b> | <b>Life Cycle<br/>GHGs<br/>[g CO<sub>2</sub>e/kWh]</b> |
|------------------------------------------------------|----------------|------------------------------------------------------|------------------------------------------------|--------------------------------------------------------|
| Alaska Systems Coordinating Council                  | ASCC           | 100                                                  | 423                                            | 523                                                    |
| Florida Reliability Coordinating Council             | FRCC           | 91                                                   | 531                                            | 622                                                    |
| Hawaiian Islands Coordinating Council                | HICC           | 148                                                  | 594                                            | 742                                                    |
| Midwest Reliability Organization                     | MRO            | 78                                                   | 551                                            | 629                                                    |
| Northeast Power Coordinating Council                 | NPCC           | 95                                                   | 443                                            | 538                                                    |
| Reliability First Corporation                        | RFC            | 81                                                   | 773                                            | 854                                                    |
| SERC Reliability Corporation                         | SERC           | 84                                                   | 649                                            | 733                                                    |
| Southwest Power Pool                                 | SPP            | 85                                                   | 639                                            | 724                                                    |
| Texas Regional Entity                                | TRE            | 88                                                   | 551                                            | 639                                                    |
| Western Electricity Coordinating Council             | WECC           | 89                                                   | 327                                            | 416                                                    |
| U.S. Non-Baseload<br>Future Low-Carbon Grid Scenario | U.S.           | 86                                                   | 568                                            | 654<br>200                                             |

Note: Data for Non-Baseload resources for NERC regions and the U.S. are from US EPA<sup>1</sup>. The data are from the 2017 version of eGRID, which use 2014 data.

**Supplementary Table 12:** Alternative Non-Baseload Life Cycle Emissions Factors for Electricity for eGRID Subregions

| EPA eGRID Subregion             | EPA Subregion Acronym | Upstream GHGs [g CO <sub>2</sub> e/kWh] | Direct GHGs [g CO <sub>2</sub> e/kWh] | Life Cycle GHGs [g CO <sub>2</sub> e/kWh] |
|---------------------------------|-----------------------|-----------------------------------------|---------------------------------------|-------------------------------------------|
| ASCC Alaska Grid                | AKGD                  | 99                                      | 412                                   | 511                                       |
| ASCC Miscellaneous              | AKMS                  | 118                                     | 459                                   | 577                                       |
| WECC Southwest                  | AZNM                  | 91                                      | 429                                   | 520                                       |
| WECC California                 | CAMX                  | 95                                      | 272                                   | 367                                       |
| ERCOT All                       | ERCT                  | 90                                      | 485                                   | 575                                       |
| FRCC All                        | FRCC                  | 91                                      | 532                                   | 623                                       |
| HICC Miscellaneous              | HIMS                  | 147                                     | 472                                   | 619                                       |
| HICC Oahu                       | HIOA                  | 149                                     | 662                                   | 811                                       |
| MRO East                        | MROE                  | 79                                      | 780                                   | 860                                       |
| MRO West                        | MROW                  | 78                                      | 503                                   | 581                                       |
| NPCC New England                | NEWE                  | 95                                      | 430                                   | 526                                       |
| WECC Northwest                  | NWPP                  | 84                                      | 264                                   | 348                                       |
| NPCC NYC/Westchester            | NYCW                  | 97                                      | 567                                   | 664                                       |
| NPCC Long Island                | NYLI                  | 102                                     | 608                                   | 710                                       |
| NPCC Upstate NY                 | NYUP                  | 92                                      | 364                                   | 455                                       |
| RFC East                        | RFCE                  | 88                                      | 632                                   | 720                                       |
| RFC Michigan                    | RFCM                  | 81                                      | 782                                   | 863                                       |
| RFC West                        | RFCW                  | 79                                      | 822                                   | 901                                       |
| WECC Rockies                    | RMPA                  | 82                                      | 605                                   | 687                                       |
| SPP North                       | SPNO                  | 78                                      | 689                                   | 767                                       |
| SPP South                       | SPSO                  | 85                                      | 673                                   | 758                                       |
| SERC Mississippi Valley         | SRMV                  | 89                                      | 608                                   | 697                                       |
| SERC Midwest                    | SRMW                  | 75                                      | 837                                   | 913                                       |
| SERC South                      | SRSO                  | 85                                      | 591                                   | 676                                       |
| SERC Tennessee Valley           | SRTV                  | 80                                      | 759                                   | 839                                       |
| SERC Virginia/Carolina          | SRVC                  | 86                                      | 583                                   | 669                                       |
| Future Low-Carbon Grid Scenario |                       |                                         |                                       | 200                                       |

Note: Data for Non-Baseload Emissions factors for EPA eGRID subregions are from US EPA<sup>1</sup>. The data are from the 2017 version of eGRID, which use 2014 data. CH<sub>4</sub> and N<sub>2</sub>O global warming potentials from IPCC AR5<sup>31</sup> are used. Future low-carbon assumption represents sensitivity case for low-carbon regional electricity grid.

**Supplementary Table 13: Life cycle g GHGs per package for small drones**

|                                   | <b>Small Drone with 200 g GHG/kWh electricity</b> | <b>Small Drone in California</b> | <b>Small Drone U.S. Average</b> | <b>Small Drone in Missouri</b> | <b>Small Drone with 1000 g GHG/kWh electricity</b> |
|-----------------------------------|---------------------------------------------------|----------------------------------|---------------------------------|--------------------------------|----------------------------------------------------|
| <b>Battery Production</b>         | 16                                                | 16                               | 16                              | 16                             | 16                                                 |
| <b>Transportation Electricity</b> | 16                                                | 30                               | 53                              | 74                             | 81                                                 |
| <b>Warehouse Electricity</b>      | 140                                               | 257                              | 458                             | 639                            | 700                                                |
| <b>Warehouse Natural Gas</b>      | 118                                               | 118                              | 118                             | 118                            | 118                                                |
|                                   |                                                   |                                  |                                 |                                |                                                    |
| <b>Total</b>                      | 290                                               | 421                              | 645                             | 847                            | 915                                                |

**Supplementary Table 14: Life cycle g GHGs per package for large drones**

|                                   | <b>Large Drone with 200 g GHG/kWh electricity</b> | <b>Large Drone in California</b> | <b>Large Drone U.S. Average</b> | <b>Large Drone in Missouri</b> | <b>Large Drone with 1000 g GHG/kWh electricity</b> |
|-----------------------------------|---------------------------------------------------|----------------------------------|---------------------------------|--------------------------------|----------------------------------------------------|
| <b>Battery Production</b>         | 158                                               | 158                              | 158                             | 158                            | 158                                                |
| <b>Transportation Electricity</b> | 162                                               | 297                              | 530                             | 740                            | 810                                                |
| <b>Warehouse Electricity</b>      | 140                                               | 257                              | 458                             | 639                            | 700                                                |
| <b>Warehouse Natural Gas</b>      | 118                                               | 118                              | 118                             | 118                            | 118                                                |
|                                   |                                                   |                                  |                                 |                                |                                                    |
| <b>Total</b>                      | 578                                               | 830                              | 1264                            | 1654                           | 1786                                               |

**Supplementary Table 15: Life cycle g GHGs per package for parcel delivery trucks**

|                                        | <b>Diesel Truck</b> | <b>Natural Gas Truck</b> | <b>Electric Truck in California</b> | <b>Electric Truck U.S. Average</b> | <b>Electric Truck in Missouri</b> |
|----------------------------------------|---------------------|--------------------------|-------------------------------------|------------------------------------|-----------------------------------|
| <b>Battery Production</b>              |                     |                          | 40                                  | 40                                 | 40                                |
| <b>Transportation Electricity</b>      |                     |                          | 345                                 | 615                                | 857                               |
| <b>Upstream Transportation Fuels</b>   | 138                 | 112                      |                                     |                                    |                                   |
| <b>Transportation Fuels Combustion</b> | 590                 | 471                      |                                     |                                    |                                   |
| <b>Warehouse Electricity</b>           | 229                 | 229                      | 129                                 | 229                                | 320                               |
| <b>Warehouse Natural Gas</b>           | 59                  | 59                       | 59                                  | 59                                 | 59                                |
|                                        |                     |                          |                                     |                                    |                                   |
| <b>Total</b>                           | 1015                | 871                      | 572                                 | 943                                | 1276                              |

**Supplementary Table 16: Life cycle g GHGs per package for parcel delivery vans**

|                                        | <b>Gasoline Van</b> | <b>Electric Van in California</b> | <b>Electric Van U.S. Average</b> | <b>Electric Van in Missouri</b> |
|----------------------------------------|---------------------|-----------------------------------|----------------------------------|---------------------------------|
| <b>Battery Production</b>              |                     | 11                                | 11                               | 11                              |
| <b>Transportation Electricity</b>      |                     | 104                               | 185                              | 258                             |
| <b>Upstream Transportation Fuels</b>   | 83                  |                                   |                                  |                                 |
| <b>Transportation Fuels Combustion</b> | 213                 |                                   |                                  |                                 |
| <b>Warehouse Electricity</b>           | 458                 | 257                               | 458                              | 639                             |
| <b>Warehouse Natural Gas</b>           | 118                 | 118                               | 118                              | 118                             |
|                                        |                     |                                   |                                  |                                 |
| <b>Total</b>                           | 872                 | 489                               | 772                              | 1026                            |

**Supplementary Table 17: Life cycle g GHGs per package for passenger cars**

|                                        | <b>Personal Gasoline Car</b> | <b>Personal Electric Vehicle in California</b> | <b>Personal Electric Vehicle U.S. Average</b> | <b>Personal Electric Vehicle in Missouri</b> |
|----------------------------------------|------------------------------|------------------------------------------------|-----------------------------------------------|----------------------------------------------|
| <b>Battery Production</b>              |                              | 205                                            | 205                                           | 205                                          |
| <b>Transportation Electricity</b>      |                              | 1619                                           | 2887                                          | 4027                                         |
| <b>Upstream Transportation Fuels</b>   | 1280                         |                                                |                                               |                                              |
| <b>Transportation Fuels Combustion</b> | 3288                         |                                                |                                               |                                              |
| <b>Warehouse Electricity</b>           |                              | 128                                            | 229                                           | 320                                          |
| <b>Warehouse Natural Gas</b>           | 59                           | 59                                             | 59                                            | 59                                           |
|                                        |                              |                                                |                                               |                                              |
| <b>Total</b>                           | 4627                         | 2011                                           | 3380                                          | 4611                                         |

## Supplementary References

1. US EPA. *Emissions & Generation Resource Integrated Database, eGRID2010 Version 1.0, Ninth Edition*. (U.S. Environmental Protection Agency, 2014).
2. IEA. *CO2 Emissions from Fuel Combustion*. (International Energy Agency, 2015).
3. Kopera, J. J. Inside the Nickel metal hydride battery. *Cobasys MI USA* (2004). Available at: [http://www.cobasys.com/pdf/tutorial/inside\\_nimh\\_battery\\_technology.pdf](http://www.cobasys.com/pdf/tutorial/inside_nimh_battery_technology.pdf)

4. Energizer Battery Manufacturing Inc. Product Datasheet ENERGIZER NH15-2300. Form No. EBC - 7102WB.
5. Beck, F. & Rüetschi, P. Rechargeable batteries with aqueous electrolytes. *Electrochimica Acta* **45**, 2467–2482 (2000). Available at: <http://data.energizer.com/PDFs/nh15-2300.pdf>
6. Power Genix. Cell Type PGX AA Consumer. (2009). Available at: [http://www.battex.info/special.php?file\\_id=48](http://www.battex.info/special.php?file_id=48)
7. Parker, J. F., Chervin, C. N., Nelson, E. S., Rolison, D. R. & Long, J. W. Wiring zinc in three dimensions re-writes battery performance-dendrite-free cycling. *Energy Environ. Sci.* **7**, 1117–1124 (2014).
8. PolyPlus Battery Company Inc. Advanced Lithium Battery Technology. (2009). Available at: <http://www.polyplus.com/technology.html>
9. Jian, Z. *et al.* Core–Shell-Structured CNT@RuO<sub>2</sub> Composite as a High-Performance Cathode Catalyst for Rechargeable Li–O<sub>2</sub> Batteries. *Angew. Chem. Int. Ed.* **53**, 442–446 (2014).
10. Shim, J., Striebel, K. A. & Cairns, E. J. The Lithium/Sulfur Rechargeable Cell: Effects of Electrode Composition and Solvent on Cell Performance. *J. Electrochem. Soc.* **149**, A1321–A1325 (2002).
11. Scrosati, B. & Garche, J. Lithium batteries: Status, prospects and future. *J. Power Sources* **195**, 2419–2430 (2010).
12. Hyperion. Hydperion G3 LiPo - Specifications. Available at: <http://media.hyperion.hk/dn/g3lipo/G3-Specs-EN.pdf>
13. Howard, W. F. & Spotnitz, R. M. Theoretical evaluation of high-energy lithium metal phosphate cathode materials in Li-ion batteries. *J. Power Sources* **165**, 887–891 (2007).

14. E-One Moli Energy Corp. Molicel Lithium-ion Rechargeable Battery, Product Data Sheet, Model ICR18650M. Available at: [http://www.molicel.com/hq/product/DM\\_ICR18650M-V1-80072.pdf](http://www.molicel.com/hq/product/DM_ICR18650M-V1-80072.pdf)
15. E-One Moli Energy Corp. Molicel Lithium-ion Rechargeable Battery, Product Data Sheet, Model IHR18650C. Available at: [http://www.molicel.com/tw/product/DM\\_IHR18650C-V1-80073.pdf](http://www.molicel.com/tw/product/DM_IHR18650C-V1-80073.pdf)
16. A123 Systems Inc. Nanophosphate Lithium Ion Prismatic Pouch Cell AMP20M1HD-A, MD100105-03. (2012). Available at: <http://wamtechnik.pl/files/specs/793.pdf>
17. Larminie, J., Dicks, A. & McDonald, M. S. *Fuel cell systems explained*. **2**, (Wiley New York, 2003).
18. Chau, K. T., Wong, Y. S. & Chan, C. C. An overview of energy sources for electric vehicles. *Energy Convers. Manag.* **40**, 1021–1039 (1999).
19. Hartman, J. *Nitrous Oxide Performance Handbook*. (MotorBooks International, 2009).
20. Fuentes, M. J., Font, R., Gómez-Rico, M. F. & Martín-Gullón, I. Pyrolysis and combustion of waste lubricant oil from diesel cars: Decomposition and pollutants. *J. Anal. Appl. Pyrolysis* **79**, 215–226 (2007).
21. Rabis, A., Rodriguez, P. & Schmidt, T. J. Electrocatalysis for Polymer Electrolyte Fuel Cells: Recent Achievements and Future Challenges. *Acs Catal.* **2**, 864–890 (2012).
22. Ramsden, T., Ulsh, M., Sprik, S., Kurtz, J. & Ainscough, C. *Direct Methanol Fuel Cell Material Handling Equipment Deployment*. (NREL, 2012).
23. Toyota Motor Corporation. Toyota's New, More Efficient Engines. (2014). Available at: <http://newsroom.toyota.co.jp/en/download/2610289>
24. United Farmers of Alberta. *Lubricant Handbook*. (2008). Available at: <http://www.ufa.com/PDFFiles/lubricantHandbook/Complete%20Lube%20Handbook.pdf>



25. Department of Energy. *Fuel Cell Technologies Office Multi-Year Research, Development, and Demonstration Plan - Section 3.3 Hydrogen Storage*. (Office of Energy Efficiency and Renewable Energy, 2012).
24. Toshiba. Toshiba launches direct methanol fuel cell in Japan as external power for mobile devices. (2009). Available at:  
[http://www.toshiba.com/taec/news/press\\_releases/2009/dmfc\\_09\\_580.jsp](http://www.toshiba.com/taec/news/press_releases/2009/dmfc_09_580.jsp)
25. Horizon Fuel Cell Technologies. H-12 Fuel Cell Stack User Manual. (2011). Available at:  
[http://media.wix.com/ugd/047f54\\_20cb233d0d0cfde250aae8035191421b.pdf](http://media.wix.com/ugd/047f54_20cb233d0d0cfde250aae8035191421b.pdf)
28. Tong, F., Jaramillo, P. & Azevedo, I. M. L. Comparison of Life Cycle Greenhouse Gases from Natural Gas Pathways for Medium and Heavy-Duty Vehicles. *Environ. Sci. Technol.* (2015).  
doi:10.1021/es5052759
29. US DOE. FuelEconomy.gov. (2016). Available at: <http://fueleconomy.gov/>. (Accessed: 22nd September 2016)
30. Argonne National Laboratory. *GREET.Net Database*. (U.S. Department of Energy, 2014).
31. IPCC. *Climate Change 2013: The Physical Science Basis. Contribution of Working Group I to the Fifth Assessment Report of the Intergovernmental Panel on Climate Change [Stocker, T.F., D. Qin, G.-K. Plattner, M. Tignor, S.K. Allen, J. Boschung, A. Nauels, Y. Xia, V. Bex and P.M. Midgley (eds.)]*. (Cambridge University Press, 2013).
